# Supplementary material for: Preliminary evaluation of fecal fatty acid concentrations in cats with chronic kidney disease and correlation with indoxyl sulfate and p‐cresol sulfate
Source: PubMed Central journal article supplement — J Vet Intern Med. 2019 Nov 6;34(1):206–15. doi: 10.1111/jvim.15634 (PMC6979089; doi:10.1111/jvim.15634), 2019-11-06
Supplement: JVIM-34-206-s001.pdf [file JVIM-34-206-s001.pdf]

**Table S1.** Clinical scoring system used to determine muscle condition, appetite, consistency of feces, and frequency of vomiting.

| <b>Score Parameter</b> | <b>Description</b>                                                                                                                                                                                             |
|------------------------|----------------------------------------------------------------------------------------------------------------------------------------------------------------------------------------------------------------|
| Muscle Score           | 0 = normal<br>1 = mild muscle loss<br>2 = moderate muscle loss<br>3 = severe muscle loss                                                                                                                       |
| Appetite Score         | 0 = none of the food consumed<br>1 = 25% of ration consumed<br>2 = 50% of ration consumed<br>3 = 75% of ration consumed<br>4 = all food consumed                                                               |
| Fecal Score            | 1 = very hard and dry<br>2 = firm but not hard<br>3 = normal, little or no segmentation, moist<br>4 = very moist, log shaped<br>5 = very moist, piles<br>6 = texture but no defined shape<br>7 = watery puddle |
| Vomiting Score         | 0 = Never<br>1 = Rare (1-2 times a year)<br>2 = Once monthly<br>3 = Once weekly                                                                                                                                |
